# Supplementary material for: Ribosomal protein S6 promotes stem‐like characters in glioma cells
Source: PubMed Central journal article supplement — Cancer Sci. 2020 Apr 30;111(6):2041–51. doi: 10.1111/cas.14399 (PMC7293102; doi:10.1111/cas.14399), 2020-04-30
Supplement: CAS-111-2041-s001.pdf [file CAS-111-2041-s001.pdf]

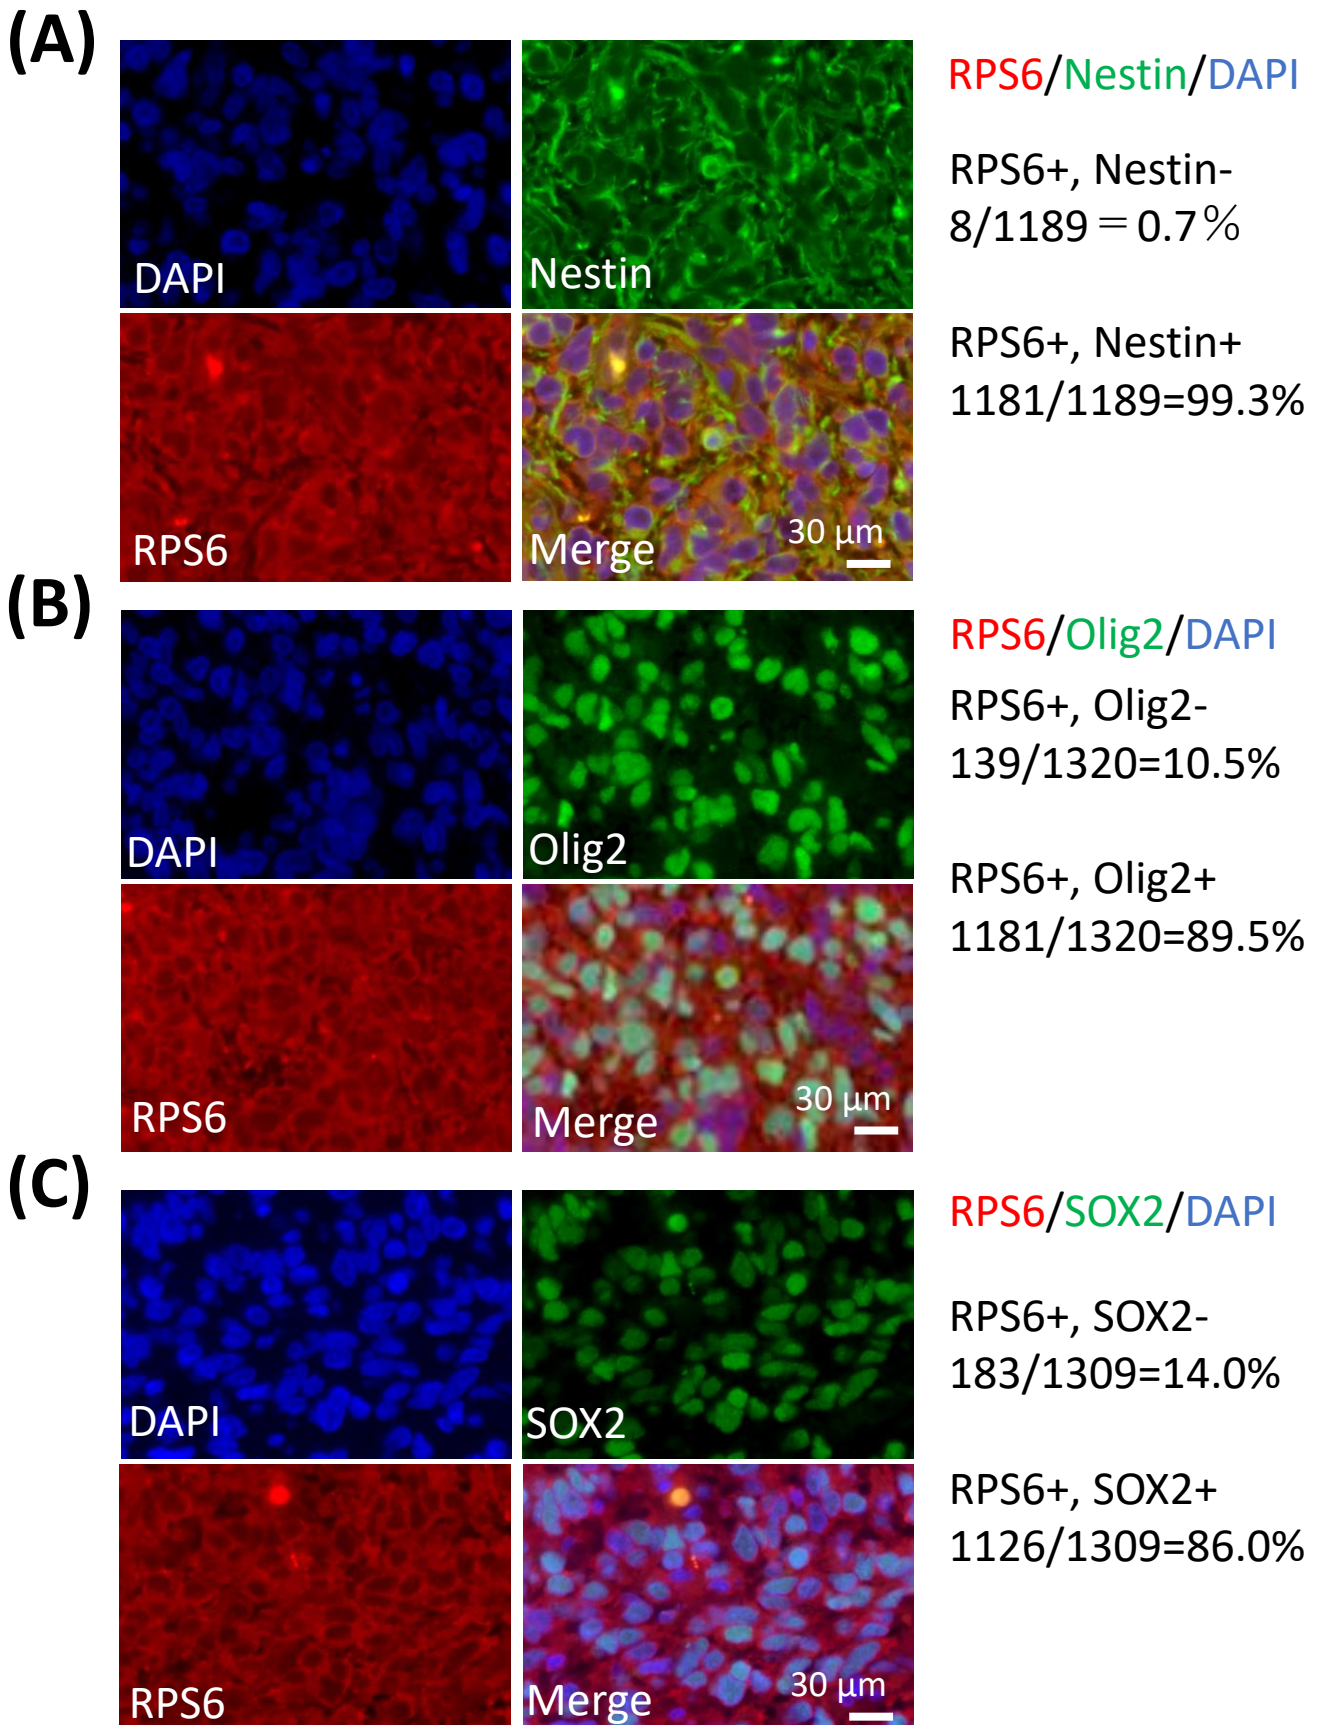

Fig.S1 Representative pictures of immunohistochemical staining. Images showing double staining with RPS6 and Nestin (A), Olig2 (B), SOX2 (C). Double positive cells were counted.
