# Supplementary material for: Ribosomal protein S6 promotes stem‐like characters in glioma cells
Source: PubMed Central journal article supplement — Cancer Sci. 2020 Apr 30;111(6):2041–51. doi: 10.1111/cas.14399 (PMC7293102; doi:10.1111/cas.14399), 2020-04-30
Supplement: CAS-111-2041-s002.pdf [file CAS-111-2041-s002.pdf]

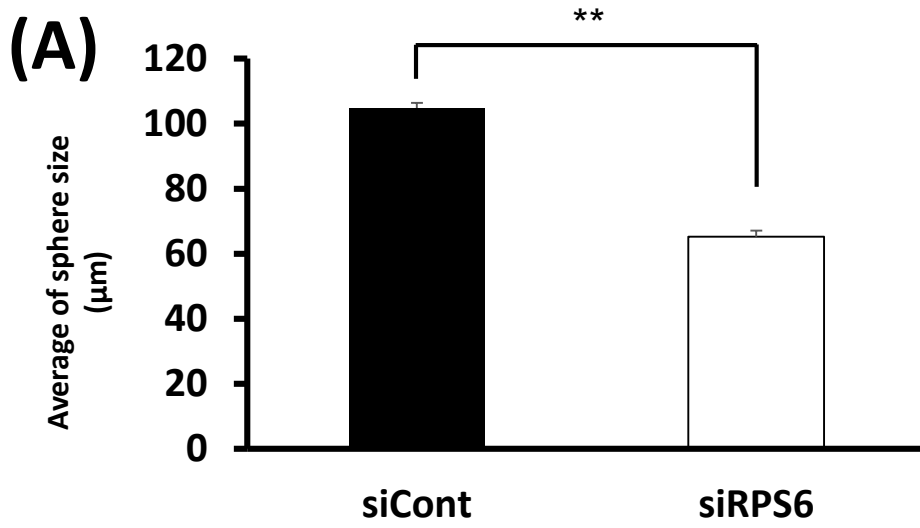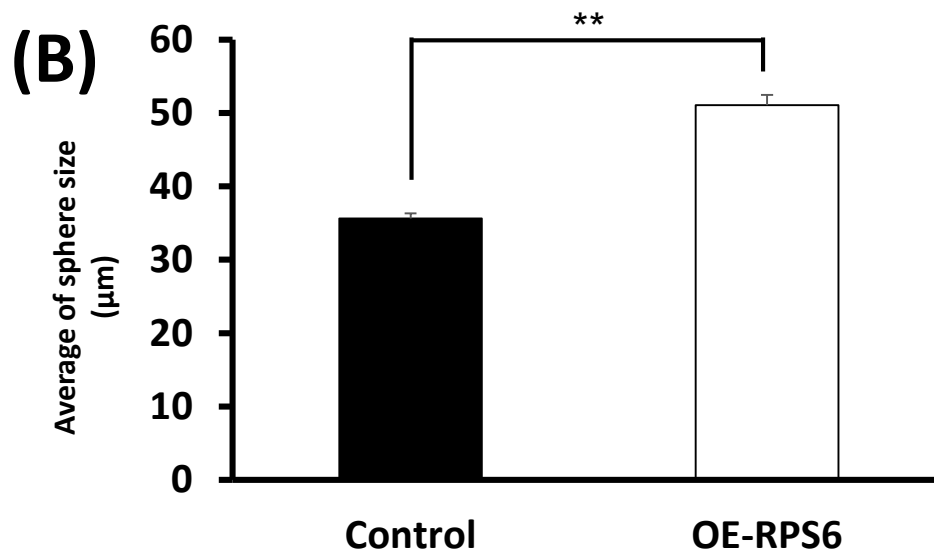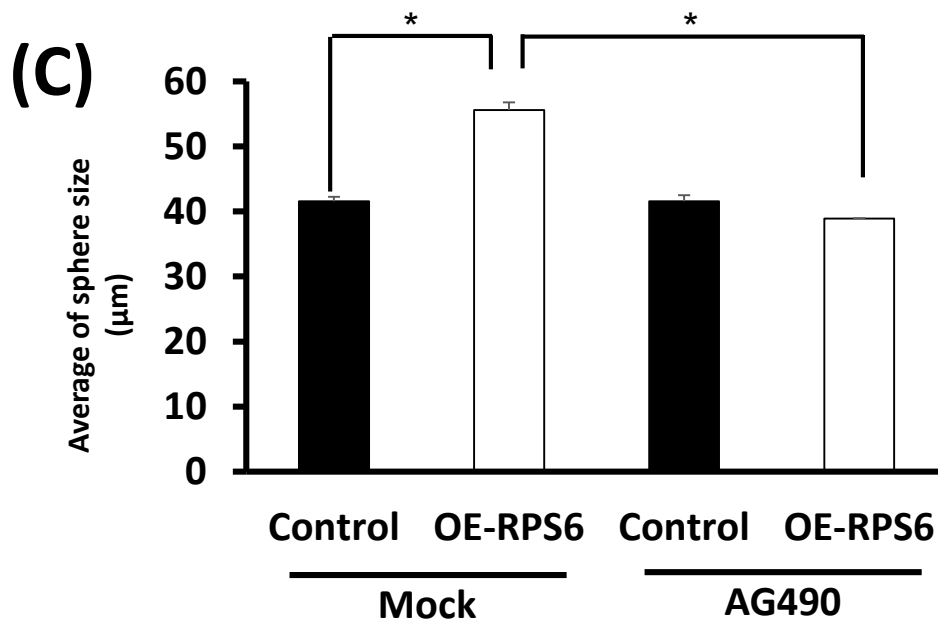

Fig.S2 (A) A graph showing average size of spheres RPS6 knockdown experiments in GBM cell line (U251MG). (B) A graph showing average size of Empty control vector (Control) or RPS6-expressing plasmid vector (OE-RPS6) was transfected into U251MG. (C) A graph showing average size of Control or OE-RPS6 was transfected into U251MG treatment with Mock or AG490. (values are presented as mean  $\pm$  SD of triplicate samples  $p^* < 0.05$ ,  $p^{**} < 0.01$ ).
