# Supplementary material for: Ribosomal protein S6 promotes stem‐like characters in glioma cells
Source: PubMed Central journal article supplement — Cancer Sci. 2020 Apr 30;111(6):2041–51. doi: 10.1111/cas.14399 (PMC7293102; doi:10.1111/cas.14399), 2020-04-30
Supplement: CAS-111-2041-s003.pdf [file CAS-111-2041-s003.pdf]

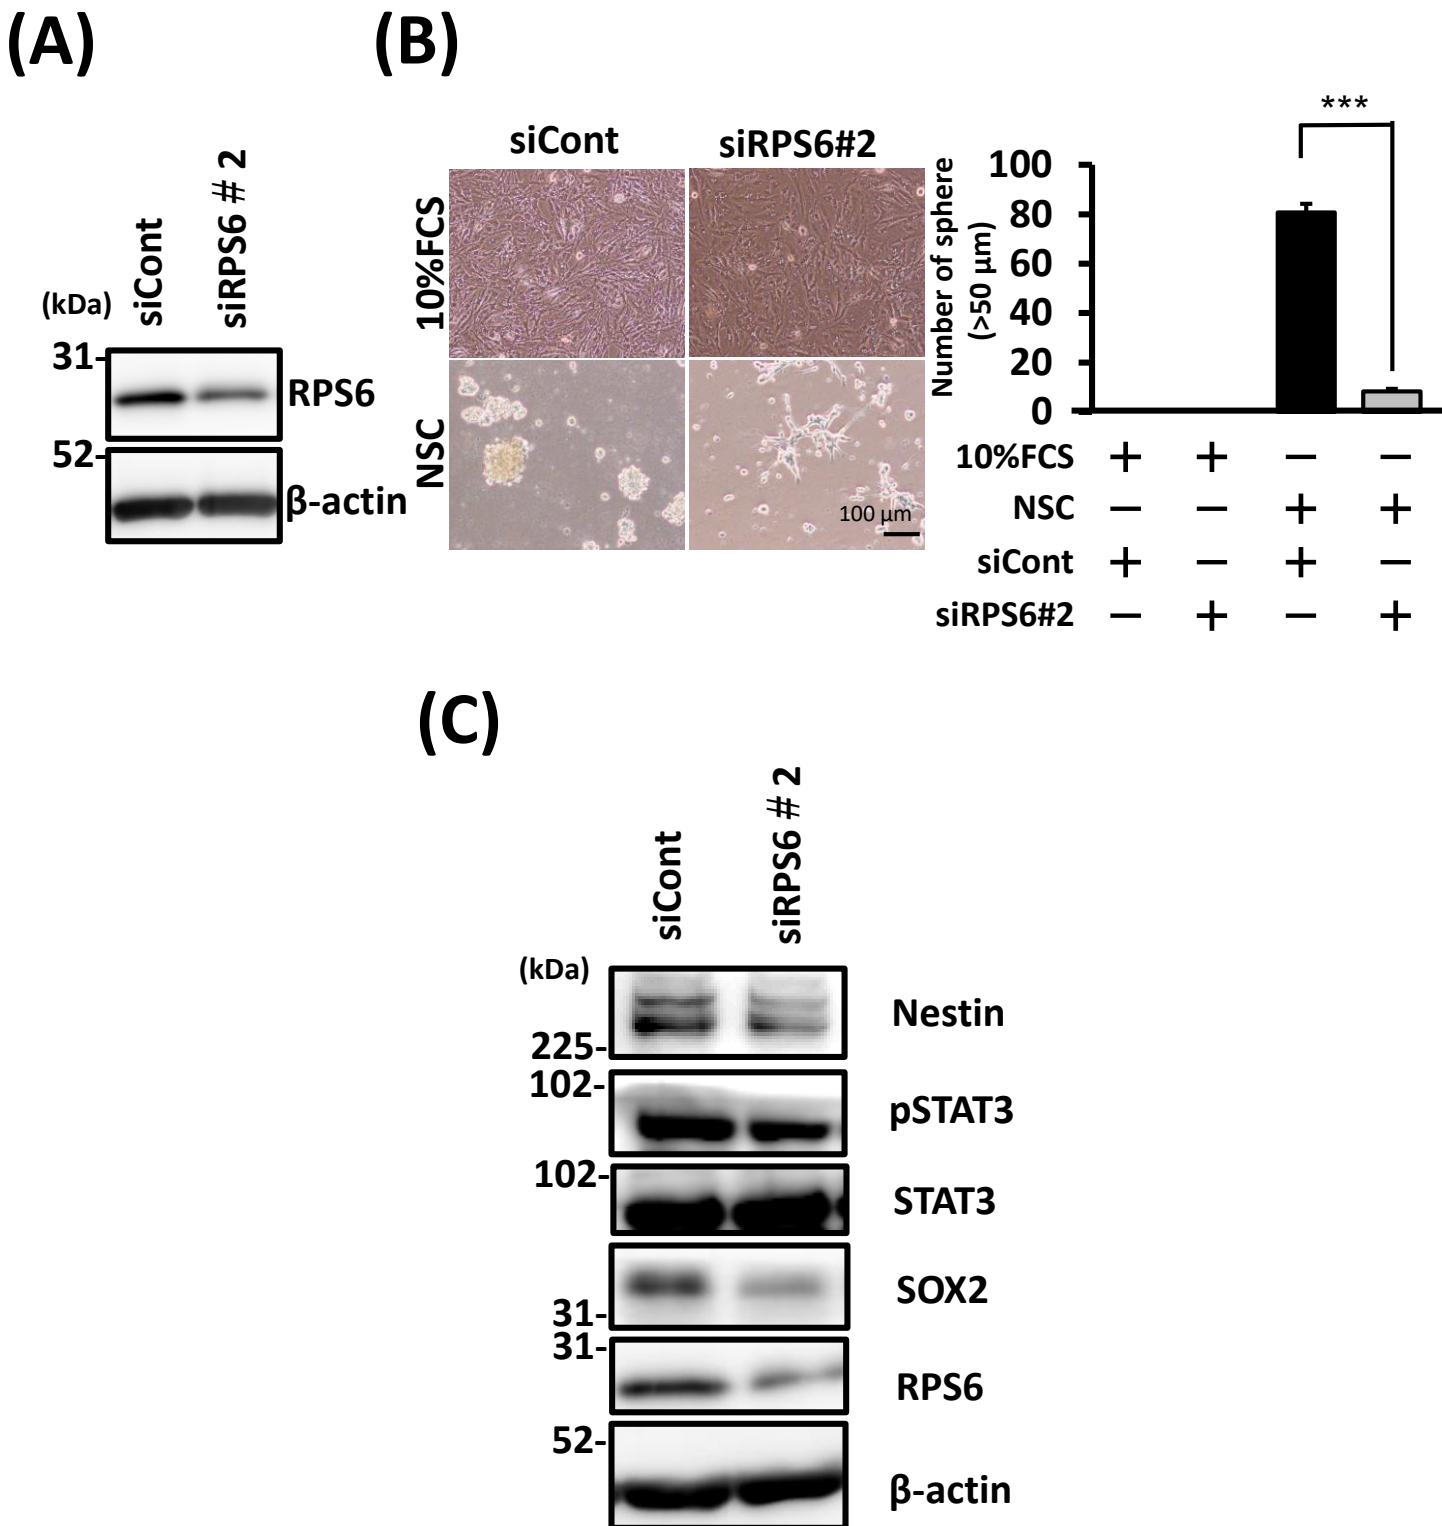

Fig.S3 (A) GBM cells (U251MG) were transfected with control siRNA (siCont) or the other siRNA specific for RPS6 (siRPS6#2). RPS6 expression was confirmed at protein level by western blotting. (B) The sphere forming potential by RPS6 knockdown in U251MG cultured in neural stem cell (NSC) medium. A graph showing the number of spheres (>50  $\mu\text{m}$ ) in NSC medium. (C) Western blot data showing that RPS6 knockdown affected expression of GSC markers (Nestin, SOX2), pSTAT3 and STAT3 in U251MG cultured in NSC medium. (values are presented as mean  $\pm$  SD of triplicate samples,  $p^{***}<0.005$ )
