# Supplementary material for: Ribosomal protein S6 promotes stem‐like characters in glioma cells
Source: PubMed Central journal article supplement — Cancer Sci. 2020 Apr 30;111(6):2041–51. doi: 10.1111/cas.14399 (PMC7293102; doi:10.1111/cas.14399), 2020-04-30
Supplement: CAS-111-2041-s004.pdf [file CAS-111-2041-s004.pdf]

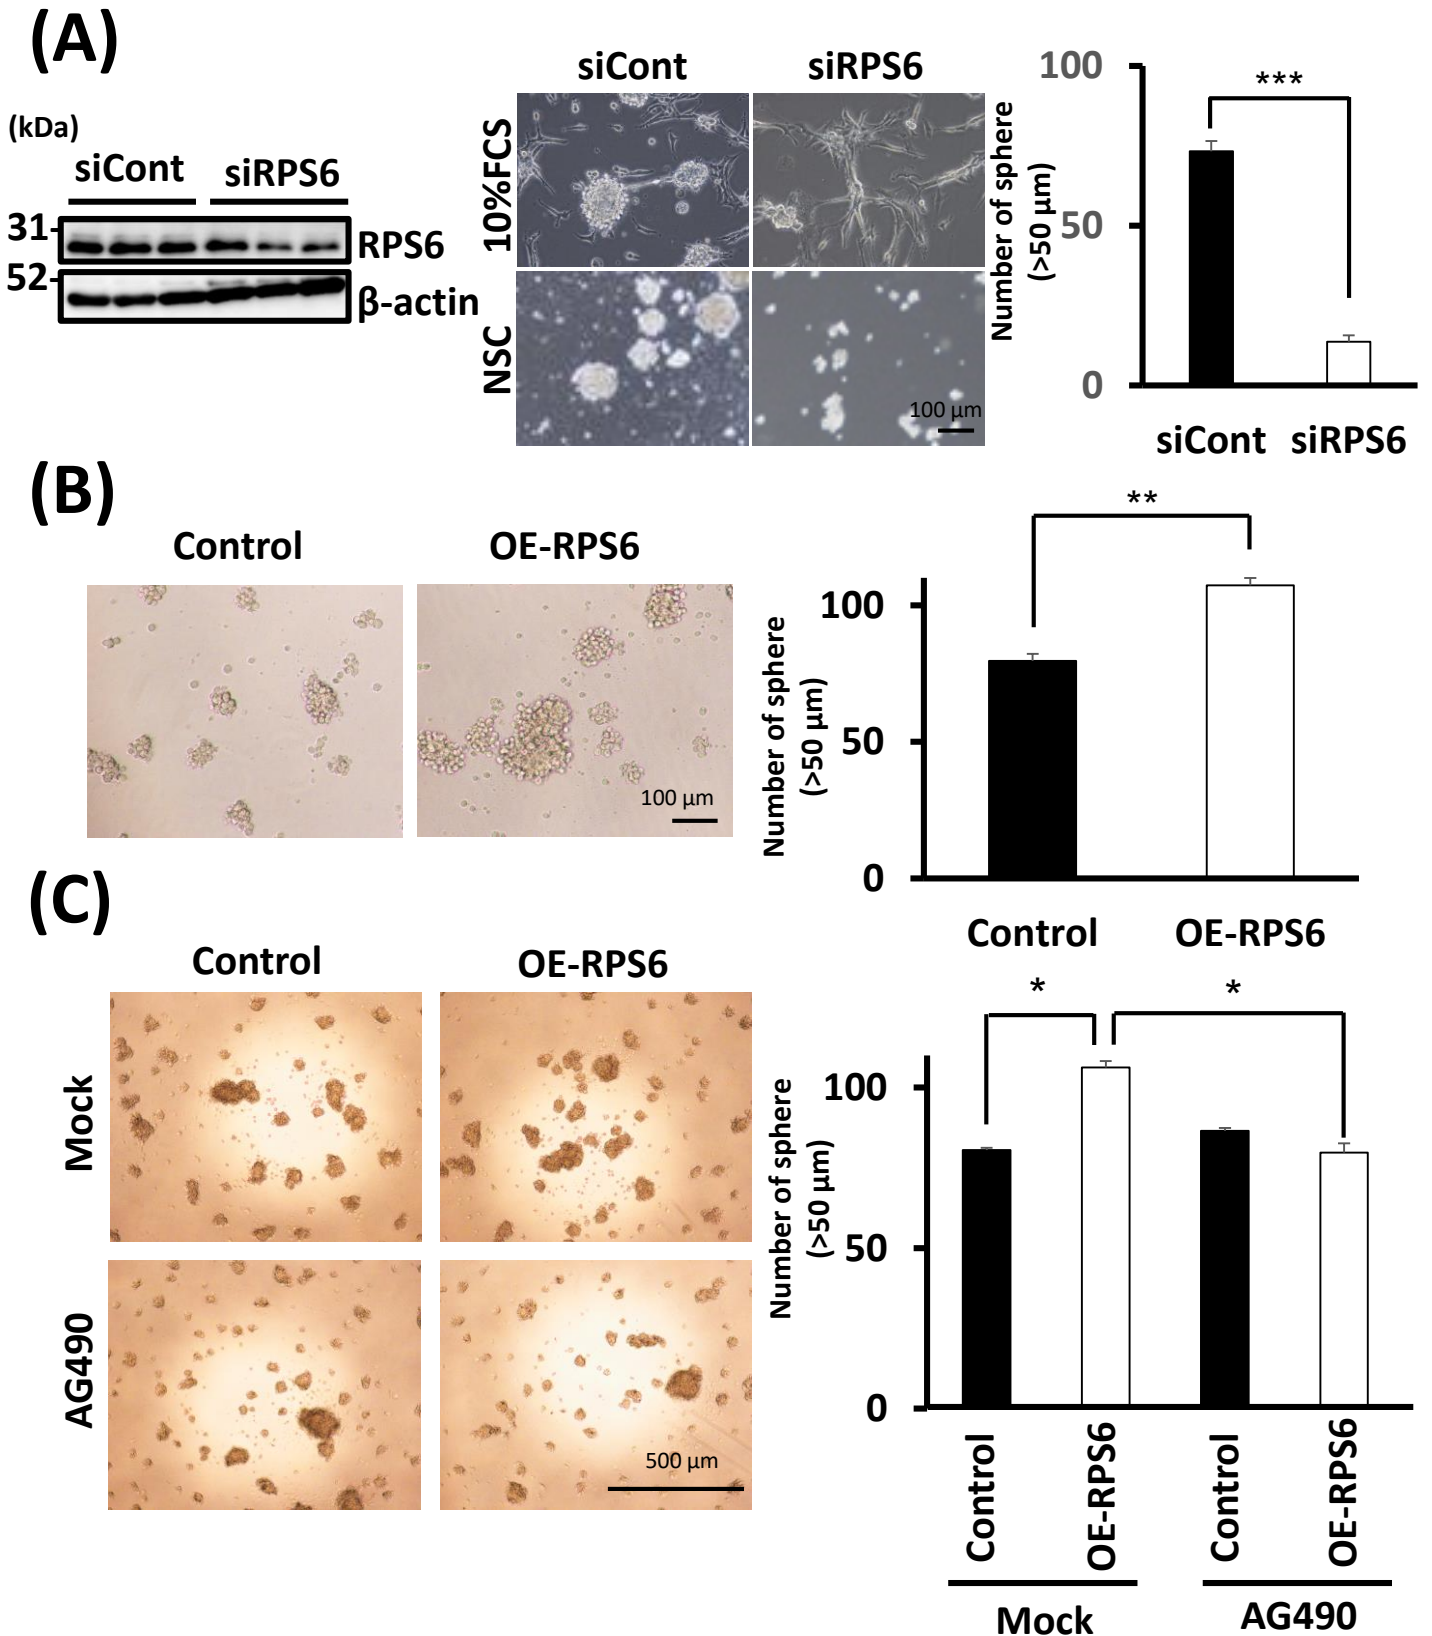

Fig.S4 (A) GBM cell line transfected with siRPS6 down-regulated expression of RPS6 in western blot and sphere forming ability in U87MG (scale bar, 100 μm). (B) Expression of Empty control vector (Control) or RPS6-expressing plasmid vector (OE-RPS6) was transfected into GBM cell line (U87MG). Images and graph displaying sphere formation of U87MG transfected with control and OE-RPS6 (scale bar, 100 μm). (C) Images and graph showing sphere forming potential of U87MG. Increased number of spheres (>50 μm) was decreased (scale bar, 500 μm). (values are presented as mean  $\pm$  SD of triplicate samples  $p^* < 0.05$ ,  $p^{**} < 0.01$ ,  $p^{***} < 0.005$ ).
