# Supplementary material for: Ribosomal protein S6 promotes stem‐like characters in glioma cells
Source: PubMed Central journal article supplement — Cancer Sci. 2020 Apr 30;111(6):2041–51. doi: 10.1111/cas.14399 (PMC7293102; doi:10.1111/cas.14399), 2020-04-30
Supplement: CAS-111-2041-s005.pdf [file CAS-111-2041-s005.pdf]

**(A)**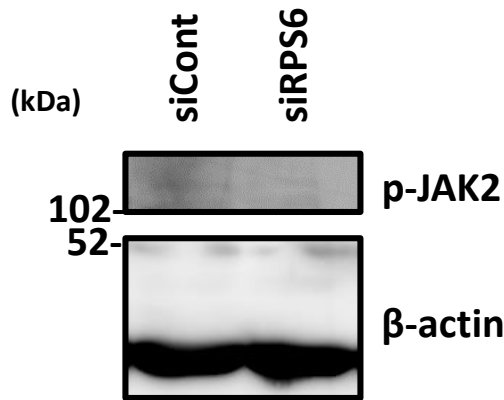**(B)**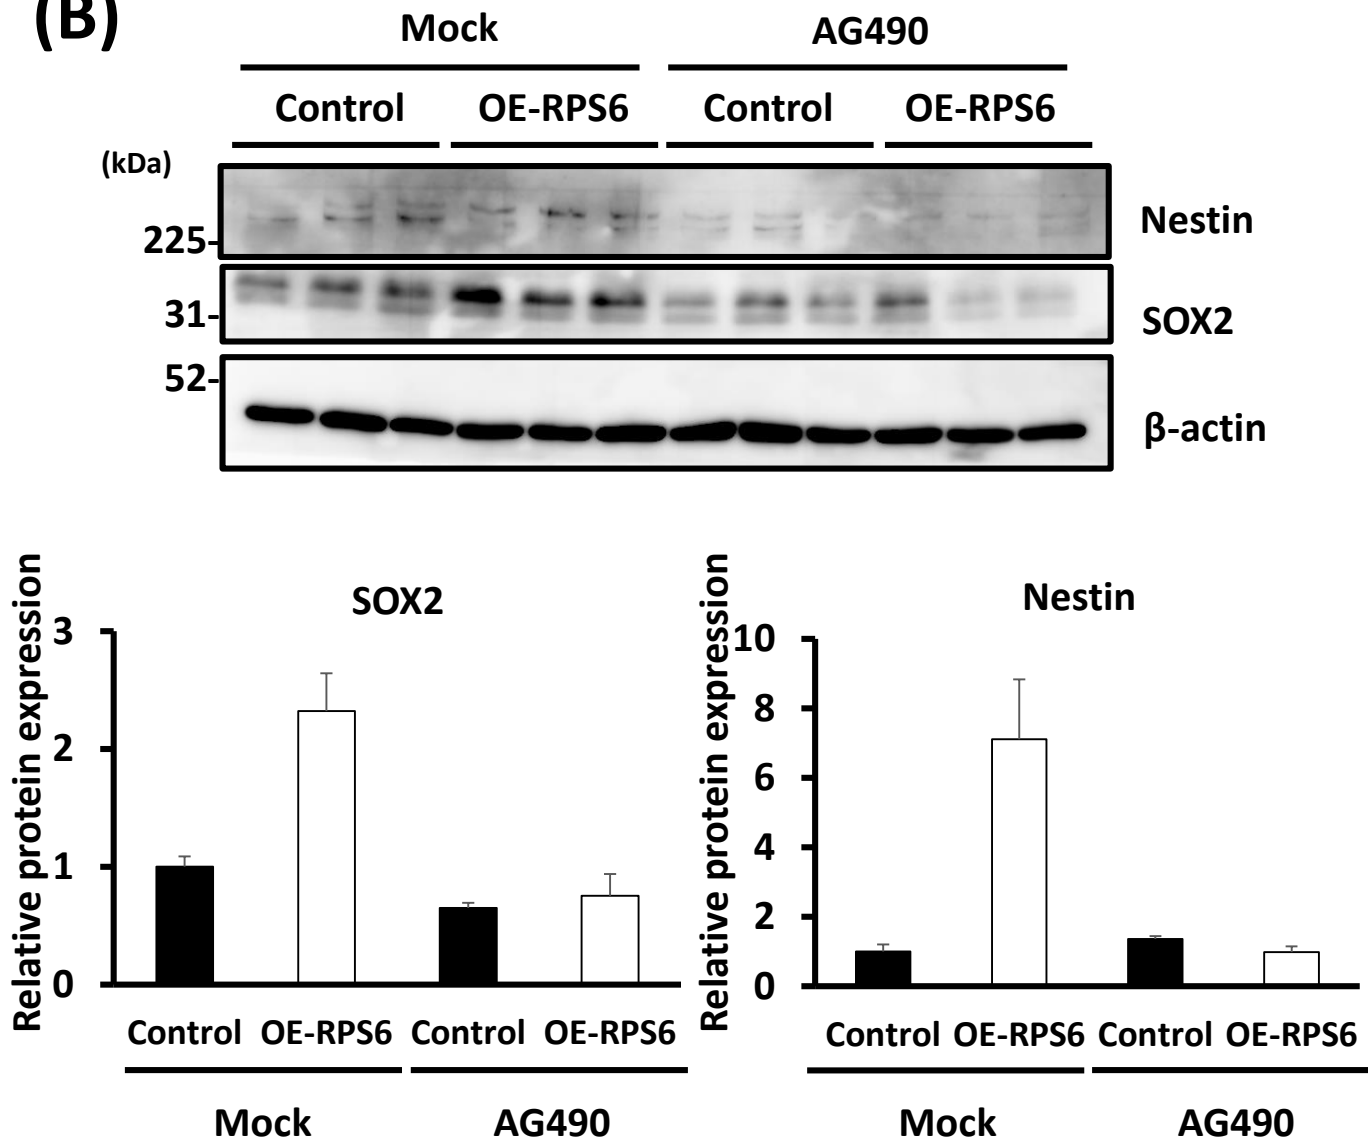

Fig.S5 (A) Western blot showing the expression of p-JAK2 in U251MG transfected with siRPS6 or siCont. (B) Western blot data showing that expression of GSC markers (Nestin, SOX2) in U251MG transfected with Empty control vector (Control) or OE-RPS6 and treatment with AG490. A graph showing the expression of GSC markers (Nestin and SOX2).
