# Supplementary material for: Ribosomal protein S6 promotes stem‐like characters in glioma cells
Source: PubMed Central journal article supplement — Cancer Sci. 2020 Apr 30;111(6):2041–51. doi: 10.1111/cas.14399 (PMC7293102; doi:10.1111/cas.14399), 2020-04-30
Supplement: CAS-111-2041-s006.pdf [file CAS-111-2041-s006.pdf]

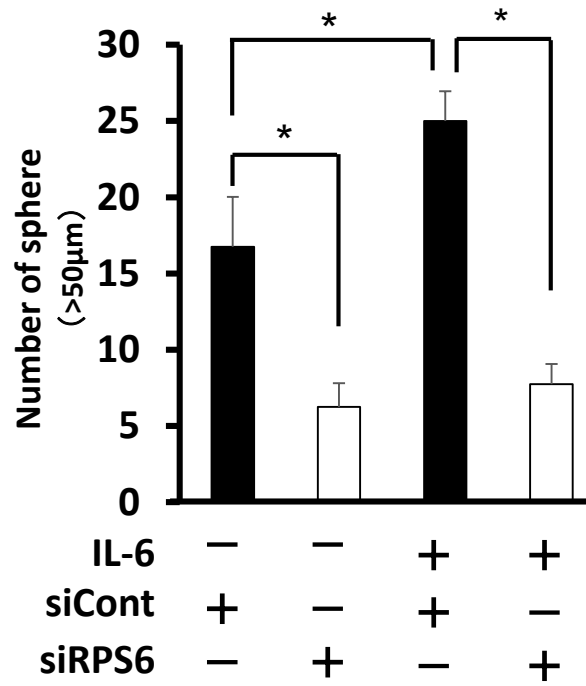

Fig.S6 IL6 up-regulated sphere forming ability of U251MG cells. This effect was canceled by transfected with siRPS6. (values are presented as mean  $\pm$  SD of triplicate samples  $p^* < 0.05$ )
