# Supplementary material for: Ribosomal protein S6 promotes stem‐like characters in glioma cells
Source: PubMed Central journal article supplement — Cancer Sci. 2020 Apr 30;111(6):2041–51. doi: 10.1111/cas.14399 (PMC7293102; doi:10.1111/cas.14399), 2020-04-30
Supplement: CAS-111-2041-s007.pdf [file CAS-111-2041-s007.pdf]

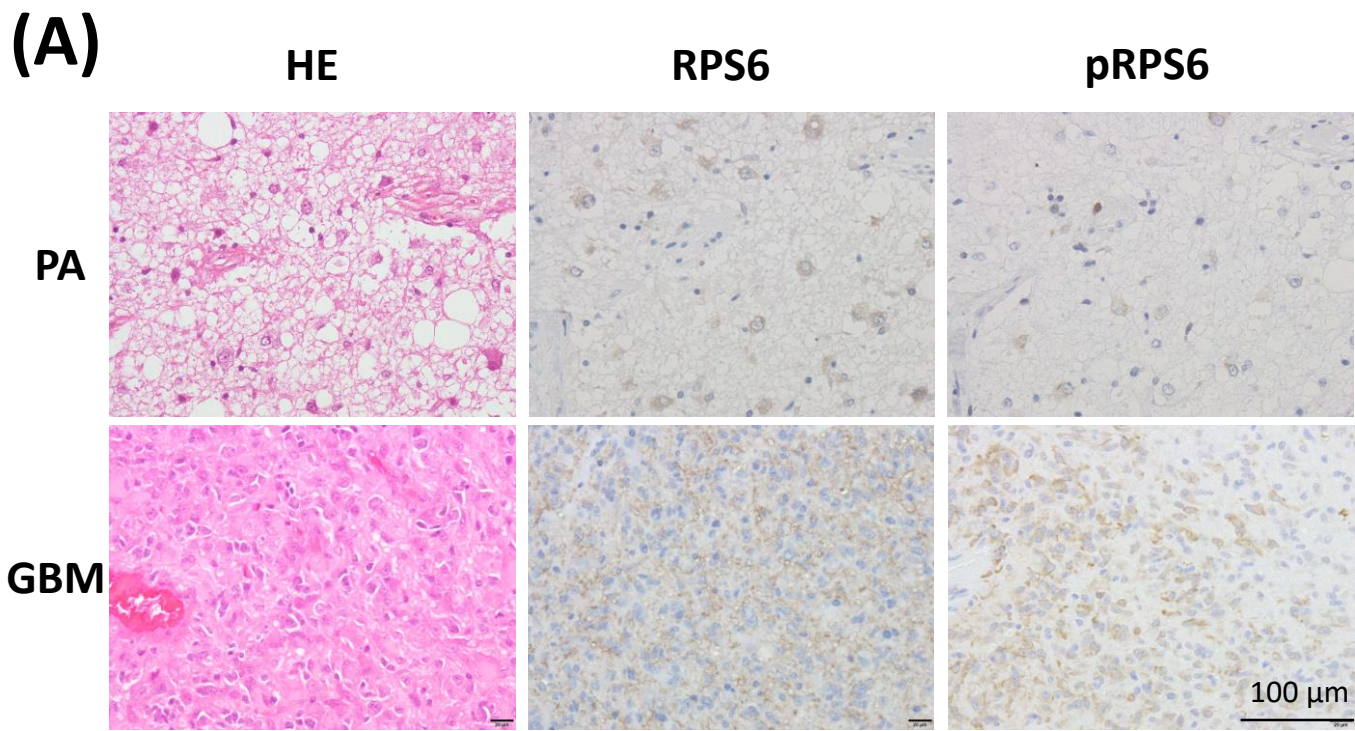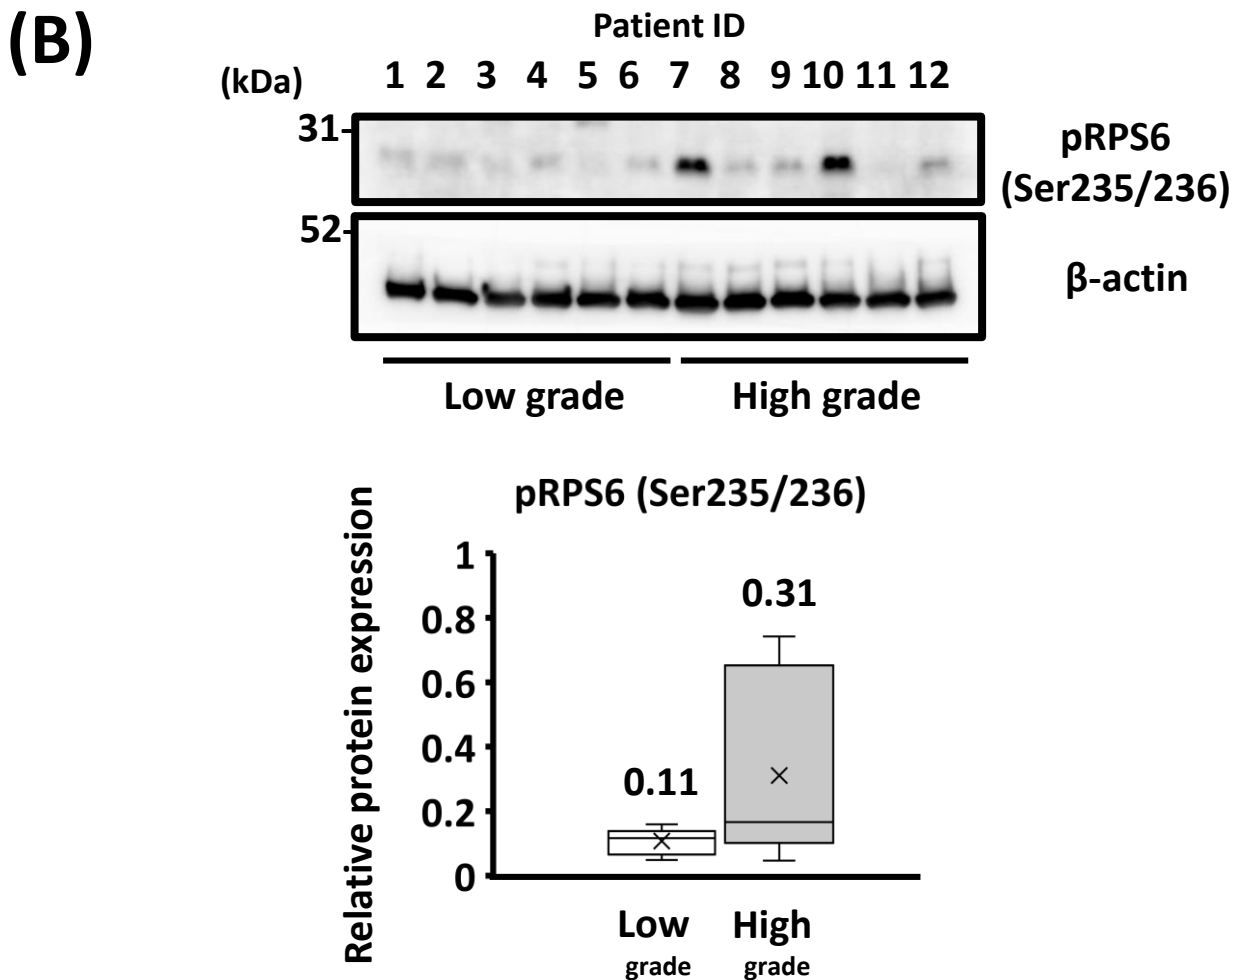

Fig.S7 (A) Representative images of hematoxylin and eosin (HE) and immunohistochemical staining. Higher expression of RPS6 and pRPS6 (Ser235/236) were detected in GBM than pilocytic astrocytoma (PA). (B) In western blotting, expression of pRPS6 (Ser235/236) in GBM was higher than that in PA. (scale bar, 100 μm)
