# Supplementary material for: Ribosomal protein S6 promotes stem‐like characters in glioma cells
Source: PubMed Central journal article supplement — Cancer Sci. 2020 Apr 30;111(6):2041–51. doi: 10.1111/cas.14399 (PMC7293102; doi:10.1111/cas.14399), 2020-04-30
Supplement: CAS-111-2041-s008.pdf [file CAS-111-2041-s008.pdf]

(A)

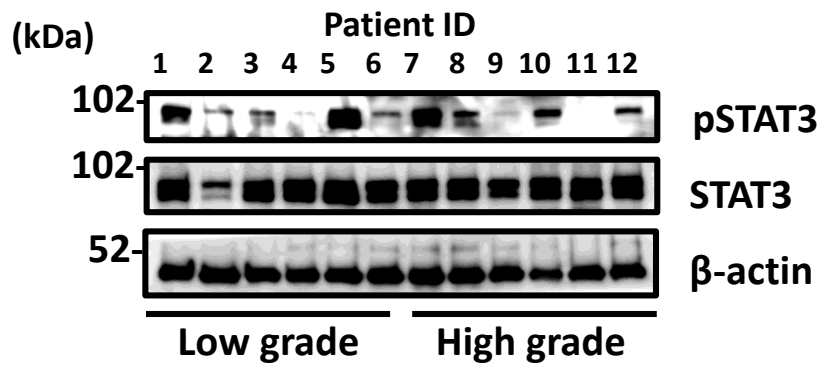

(B)

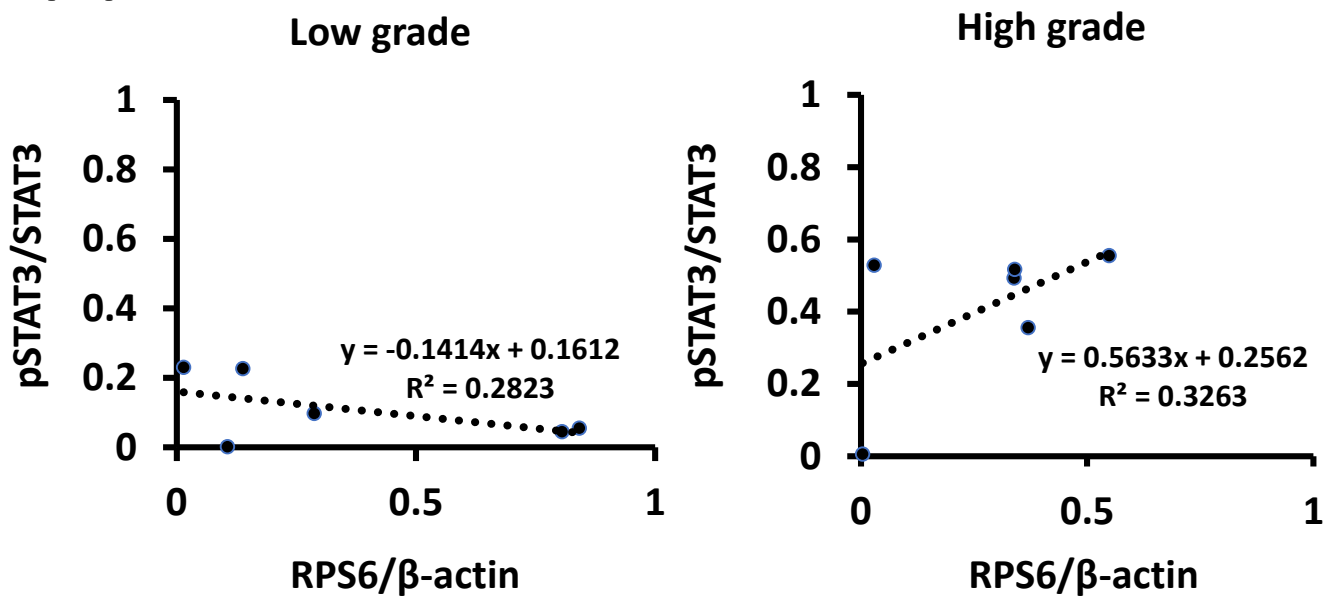

Fig.S8 (A) RPS6 and pSTAT3/STAT3 expression in human glioma tissues was analyzed by western blotting. (B) Graph showed positive correlation with RPS6 and pSTAT3/STAT3 in high grade glioma.
